# Supplementary material
Source: ML conference proceedings conference paper supplement (https://openaccess.thecvf.com/content/CVPR_2019/html/Guo_Image-Question-Answer_Synergistic_Network_CVPR_2019_paper.html)
Supplement: Supplementary file 1 [file Guo_Image-Question-Answer_Synergistic_Network_CVPR_2019_supplemental.pdf]

|                                                                                                                                                                                                                                                                                                                                    |                                                                                                                                                                        |                                                                                                                                                                                                                                                                                                                  |                                                                                                                                                                         |
|------------------------------------------------------------------------------------------------------------------------------------------------------------------------------------------------------------------------------------------------------------------------------------------------------------------------------------|------------------------------------------------------------------------------------------------------------------------------------------------------------------------|------------------------------------------------------------------------------------------------------------------------------------------------------------------------------------------------------------------------------------------------------------------------------------------------------------------|-------------------------------------------------------------------------------------------------------------------------------------------------------------------------|
| <p>Are there any other people?</p>  <p><b>Primary</b></p> <p>A1:No<br/>A2:<b>No, just her and the bird</b><br/>A3:No, just the woman and the baby that she's holding<br/>A4:Just her<br/>A5:Not that I can see</p>                                | <p><b>Synergistic</b></p> <p>A1:<b>No, just her and the bird</b><br/>A2:No<br/>A3:Just her<br/>A4:No, just the 1<br/>A5:Not that I can see</p>                         | <p>Is it daytime?</p>  <p><b>Primary</b></p> <p>A1:Yes<br/>A2:Can't tell, the photo is taken indoors<br/>A3:Unsure, because the photo is inside<br/>A4:Hard to tell with indoor light</p>                                       | <p><b>Synergistic</b></p> <p>A1:Yes daytime<br/>A2:Yes, daytime<br/>A3:<b>Yes, it is daytime</b><br/>A4:Yes</p>                                                         |
| <p>Can you see any animals?</p>  <p><b>Primary</b></p> <p>A1:No, no animals<br/>A2:<b>Yes, I can see a bird</b><br/>A3:No<br/>A4:No I can't<br/>A5:No, I can't</p>                                                                                | <p><b>Synergistic</b></p> <p>A1:<b>Yes, I can see a bird</b><br/>A2:No, no animals<br/>A3:No, just the boats<br/>A4:No<br/>A5:No I can't</p>                           | <p>What color is the person's skies?</p>  <p><b>Primary</b></p> <p>A1:Red<br/>A2:You can't see it<br/>A3:Black<br/>A4:<b>White</b><br/>A5:I cannot tell</p>                                                                     | <p><b>Synergistic</b></p> <p>A1:<b>White</b><br/>A2:Red<br/>A3:You can't see it<br/>A4:Black<br/>A5:I cannot tell</p>                                                   |
| <p>Are there any towels on the towel rack?</p>  <p><b>Primary</b></p> <p>A1:No<br/>A2:1 round soap<br/>A3:<b>No, but a black bag is</b><br/>A4:No, glass<br/>A5:No, 0</p>                                                                         | <p><b>Synergistic</b></p> <p>A1:<b>No, but a black bag is</b><br/>A2:No<br/>A3:There is a blue basket<br/>A4:1 round soap<br/>A5:No just 1</p>                         | <p>Can you only see his face?</p>  <p><b>Primary</b></p> <p>A1:Yes<br/>A2:Yes!<br/>A3:Yes the back of it<br/>A4:<b>His face and his chest are visible</b><br/>A5:Yup</p>                                                        | <p><b>Synergistic</b></p> <p>A1:<b>His face and his chest are visible</b><br/>A2:Yes!<br/>A3:Yes<br/>A4:Yes the back of it<br/>A5:Yup</p>                               |
| <p>Is it sunny out?</p>  <p><b>Primary</b></p> <p>A1:Yes<br/>A2:Poor bear indeed it is daytime<br/>A3:It is hard to tell<br/>A4:I believe so<br/>A5:Appears to be a nice day</p>                                                                  | <p><b>Synergistic</b></p> <p>A1:Yes<br/>A2:<b>I think so, but the sky is blurry in the background</b><br/>A3:It is hard to tell<br/>A4:Yes, it is<br/>A5:Yes it is</p> | <p>Does it (refrigerator) have rounded edges or square?</p>  <p><b>Primary</b></p> <p>A1:Square with rounded ends<br/>A2:Rectangle<br/>A3:Round<br/>A4:<b>Rounded</b><br/>A5:Thick</p>                                          | <p><b>Synergistic</b></p> <p>A1:<b>Rounded</b><br/>A2:Rectangle<br/>A3:Round<br/>A4:Square with rounded ends<br/>A5:Can't tell</p>                                      |
| <p>Do you know the type?</p>  <p><b>Primary</b></p> <p>A1:No<br/>A2:Some of the top, middle and space key<br/>A3:Not really<br/>A4:Coca cola<br/>A5:Yes</p>                                                                                      | <p><b>Synergistic</b></p> <p>A1:<b>1 fern and 1 hosta</b><br/>A2:No<br/>A3:Yes<br/>A4:Some of the top, middle and space key<br/>A5:Not really</p>                      | <p>Does it have long hair?</p>  <p><b>Primary</b></p> <p>A1:No, very short hair<br/>A2:No<br/>A3:Short hair<br/>A4:Long hair<br/>A5:No, she has very short hair</p>                                                            | <p><b>Synergistic</b></p> <p>A1:No, very short hair<br/>A2:No, she has very short hair<br/>A3:<b>Short hair but the tail is very puffy with long fur</b><br/>A4:Yes</p> |
| <p>Where is the boat located?</p>  <p><b>Primary</b></p> <p>A1:At the balcony<br/>A2:<b>On the shore</b><br/>A3:In the train station<br/>A4:On the side of the road<br/>A5:To the right</p>                                                     | <p><b>Synergistic</b></p> <p>A1:<b>On the shore</b><br/>A2:At the balcony<br/>A3:Standing in the water<br/>A4:To the right<br/>A5:On the side of road</p>              | <p>Is it Sunny?</p>  <p><b>Primary</b></p> <p>A1:I don't know it is indoors<br/>A2:Yes<br/>A3:Can't tell<br/>A4:No<br/>A5:It's bright in the photo</p>                                                                        | <p><b>Synergistic</b></p> <p>A1:<b>Yes, sunny over the bowls</b><br/>A2:I don't know it is indoors<br/>A3:Yes<br/>A4:Can't tell<br/>A5:It's bright in the photo</p>     |
| <p>Is this in a restaurant?</p>  <p><b>Primary</b></p> <p>A1:Yes<br/>A2:Yes, I believe it is<br/>A3:I think so<br/>A4:Yes it is<br/>A5:Yes, it is</p>                                                                                           | <p><b>Synergistic</b></p> <p>A1:Yes<br/>A2:<b>Looks like a wine shop</b><br/>A3:No<br/>A4:Yes it is<br/>A5:Yes, it is</p>                                              | <p>Can you see the horizon line or the sky?</p>  <p><b>Primary</b></p> <p>A1:I cannot see the sky<br/>A2:Can't see<br/>A3:I can see the sky, no clouds<br/>A4:<b>No, just the ocean</b><br/>A5:No, the sky is not visible</p> | <p><b>Synergistic</b></p> <p>A1:<b>No, just the ocean</b><br/>A2:No,<br/>A3:No<br/>A4:No mountains can be seen<br/>A5:No, the sky is not visible</p>                    |
| <p>Anything else in the image other than 3 people, dog and cattle?</p>  <p><b>Primary</b></p> <p>A1:Yes, but also there appears to be possibly...<br/>A2:The rest of the baseball field and the fence<br/>A3:<b>Rocks, and grass mainly</b></p> | <p><b>Synergistic</b></p> <p>A1:<b>Rocks, and grass mainly</b><br/>A2:No<br/>A3:Yes<br/>A4:The rest of the baseball field and the fence</p>                            | <p>Are they talking?</p>  <p><b>Primary</b></p> <p>A1:No, just looking at their phones<br/>A2:No<br/>A3:Yes, the most prominent 1 is taking a photo</p>                                                                       | <p><b>Synergistic</b></p> <p>A1:<b>I can't see their faces, but I would guess no</b><br/>A2:No<br/>A3:No, just looking at their phones</p>                              |
| <p>Is the plate white?</p>  <p><b>Primary</b></p> <p>A1:Yes, it is a black coffee<br/>A2:No it is white<br/>A3:<b>Yes</b><br/>A4:Yes, it is<br/>A5:Yes it is</p>                                                                                | <p><b>Synergistic</b></p> <p>A1:<b>Yes</b><br/>A2:No it is white<br/>A3:Yes, it is a black coffee<br/>A4:Yes it is<br/>A5:Yes, it is</p>                               | <p>Are there any pictures on the sign?</p>  <p><b>Primary</b></p> <p>A1:Yes, there is 1 advertisement<br/>A2:Yes, 'go exit' is the words written on it<br/>A3:<b>No, it is a street name sign</b></p>                         | <p><b>Synergistic</b></p> <p>A1:<b>No, it is a street name sign</b><br/>A2:Yes, 'go exit' is the words written on it<br/>A3:Yes, there is 1 advertisement</p>           |

Figure 1. Qualitative results for our discriminative model.

|                                                                                                                                                                         |                                                                                                                                                          |                                                                                                                                                                                 |
|-------------------------------------------------------------------------------------------------------------------------------------------------------------------------|----------------------------------------------------------------------------------------------------------------------------------------------------------|---------------------------------------------------------------------------------------------------------------------------------------------------------------------------------|
| <p>Q:Does she have shoes on?<br/>A:Yes, flip fops</p>                                  | <p><b>Primary</b></p> <p>A1:Yes she does<br/>A2:No she is barefoot<br/>A3:No she does not<br/>A4:Yes she has shoes on<br/>A5:I can't see her feet</p>    | <p><b>Synergistic</b></p> <p>A1:Yes she has on flip fops<br/>A2:No she has sandals on<br/>A3:Yes she has shoes on<br/>A4:No she has shoes on<br/>A5:Yes she does</p>            |
| <p>Q:What color is the table?<br/>A:Black and silver</p>                               | <p><b>Primary</b></p> <p>A1:Black<br/>A2:White<br/>A3:Silver<br/>A4:Black and silver<br/>A5:Gray</p>                                                     | <p><b>Synergistic</b></p> <p>A1:Black and silver<br/>A2:Silver and black<br/>A3:Black<br/>A4:Silver<br/>A5:Black and gray</p>                                                   |
| <p>Q:What color is the tablet?<br/>A:Black and silver</p>                              | <p><b>Primary</b></p> <p>A1:Black<br/>A2:White<br/>A3:Silver<br/>A4:Black and silver<br/>A5:Gray</p>                                                     | <p><b>Synergistic</b></p> <p>A1:Black and silver<br/>A2:Silver and black<br/>A3:Black<br/>A4:Silver<br/>A5:Black and gray</p>                                                   |
| <p>Q:Are there any people?<br/>A:No, close up picture</p>                              | <p><b>Primary</b></p> <p>A1:No<br/>A2:0<br/>A3:No people<br/>A4:Not that I can see<br/>A5:Nope</p>                                                       | <p><b>Synergistic</b></p> <p>A1:No<br/>A2:No it's a close up<br/>A3:No it's a close up of the plate<br/>A4:No just a close up of the food</p>                                   |
| <p>Q:Are there houses?<br/>A:There are not</p>                                         | <p><b>Primary</b></p> <p>A1:No<br/>A2:I do not see any<br/>A3:Not that I can see<br/>A4:Yes<br/>A5:There are buildings in the background</p>             | <p><b>Synergistic</b></p> <p>A1:There are buildings but no houses<br/>A2:I do not see any houses<br/>A3:No there are not<br/>A4:There are buildings in the background</p>       |
| <p>Q:Is it rough on the water?<br/>A:Looks like it might be</p>                        | <p><b>Primary</b></p> <p>A1:Yes<br/>A2:Yes it is<br/>A3:Yes very<br/>A4:No<br/>A5:No it is not</p>                                                       | <p><b>Synergistic</b></p> <p>A1:Yes it looks pretty rough<br/>A2:No it is dry<br/>A3:Yes it looks pretty calm<br/>A4:Yes<br/>A5:No it is not</p>                                |
| <p>Q:Is the house wearing a saddle?<br/>A:I think so really dark</p>                   | <p><b>Primary</b></p> <p>A1:Yes<br/>A2:No<br/>A3:Yes it is<br/>A4:I can't tell<br/>A5:No saddle</p>                                                      | <p><b>Synergistic</b></p> <p>A1:I think so but it's hard to tell because it's a black and white photo<br/>A2:Yes<br/>A3:No<br/>A4:No saddle</p>                                 |
| <p>Q:Are there houses?<br/>A:There are not</p>                                         | <p><b>Primary</b></p> <p>A1:No<br/>A2:I do not see any<br/>A3:Not that I can see<br/>A4:Yes<br/>A5:There are buildings in the background</p>             | <p><b>Synergistic</b></p> <p>A1:There are buildings but no houses<br/>A2:I do not see any houses<br/>A3:No there are not<br/>A4:There are buildings in the background</p>       |
| <p>Q:Are the bikes different colors?<br/>A:No</p>                                      | <p><b>Primary</b></p> <p>A1:Yes<br/>A2:No<br/>A3:Not really<br/>A4:Different colors<br/>A5:Can't tell</p>                                                | <p><b>Synergistic</b></p> <p>A1:The photo is in black and white<br/>A2:Can't tell the photo is in black and white<br/>A3:Yes<br/>A4:No</p>                                      |
| <p>Q:What color is the tennis court?<br/>A:Green</p>                                  | <p><b>Primary</b></p> <p>A1:Green<br/>A2:Green and red<br/>A3:Green and white<br/>A4:Gray<br/>A5:Red and white</p>                                       | <p><b>Synergistic</b></p> <p>A1:Green with white lines<br/>A2:Green and black<br/>A3:Green<br/>A4:Green and white<br/>A5:Blue and green</p>                                     |
| <p>Q:What color is the apple?<br/>A:Mostly red with some yellow</p>                  | <p><b>Primary</b></p> <p>A1:Red<br/>A2:Red and yellow<br/>A3:Red and green<br/>A4:Green<br/>A5:Pale Yellow</p>                                           | <p><b>Synergistic</b></p> <p>A1:Red with a little bit of yellow<br/>A2:Red with a little bit of green<br/>A3:Red<br/>A4:Bright Red</p>                                          |
| <p>Q:Does the bike have a basket?<br/>A:No</p>                                       | <p><b>Primary</b></p> <p>A1:No<br/>A2:Yes<br/>A3:Not that I can see<br/>A4:Nope<br/>A5:No basket</p>                                                     | <p><b>Synergistic</b></p> <p>A1:No but there is a basket on the back of the bike<br/>A2:No there is no basket<br/>A3:No<br/>A4:No basket<br/>A5:Yes</p>                         |
| <p>Q:How many players are there?<br/>A:I see 2</p>                                   | <p><b>Primary</b></p> <p>A1:2<br/>A2:3<br/>A3:4<br/>A4:I see 3<br/>A5:I see 3 players</p>                                                                | <p><b>Synergistic</b></p> <p>A1:2 on the field and a few in the dugout<br/>A2:2 on the field and a few in the stands<br/>A3:2 on the field and 2 in the dugout</p>              |
| <p>Q:Can you see any signs?<br/>A:Yes, a stop sign and a railroad crossing sign</p>  | <p><b>Primary</b></p> <p>A1:Yes<br/>A2:Yes there are 2 street signs<br/>A3:Yes there is a stop sign<br/>A4:Yes a stop sign<br/>A5:Yes 2 street signs</p> | <p><b>Synergistic</b></p> <p>A1:Yes there are 2 street signs and 1 stop sign<br/>A2:Yes there are 2 street signs and a stop sign<br/>A3:Yes a stop sign and a street sign</p>   |
| <p>Q:Is there anything in the sky?<br/>A:Clouds</p>                                  | <p><b>Primary</b></p> <p>A1:No<br/>A2:Not that I can see<br/>A3:A few clouds<br/>A4:Some clouds<br/>A5:Nothing</p>                                       | <p><b>Synergistic</b></p> <p>A1:Just a lot of clouds<br/>A2:Just a bunch of clouds<br/>A3:Just a few clouds<br/>A4:Some clouds<br/>A5:No</p>                                    |
| <p>Q:Is the person old or young?<br/>A:I can't really see them</p>                   | <p><b>Primary</b></p> <p>A1:Young<br/>A2:Older<br/>A3:Middle aged<br/>A4:Old<br/>A5:I can't tell</p>                                                     | <p><b>Synergistic</b></p> <p>A1:I can only see the back of their heads so I can't tell<br/>A2:I can only see his back so I can't tell<br/>A3:Young<br/>A4:Looks young</p>       |
| <p>Q:What kind of flooring is it?<br/>A:Hardwood</p>                                 | <p><b>Primary</b></p> <p>A1:Wood flooring<br/>A2:Hardwood flooring<br/>A3:Hardwood<br/>A4:Wood flooring with a large rug</p>                             | <p><b>Synergistic</b></p> <p>A1:It's hardwood flooring with a large rug over it<br/>A2:Hardwood flooring with a large rug over it<br/>A3:Hardwood flooring with a large rug</p> |
| <p>Q:Is the bear wearing any clothes?<br/>A:Yes, a tie</p>                           | <p><b>Primary</b></p> <p>A1:No<br/>A2:Yes<br/>A3:A scarf<br/>A4:Yes a bow tie<br/>A5:Just a bow tie</p>                                                  | <p><b>Synergistic</b></p> <p>A1:Just a ribbon around his neck<br/>A2:The bear is wearing a bow tie<br/>A3:A scarf around his neck<br/>A4:Yes a bow tie<br/>A5:Just a ribbon</p> |

Figure 2. Qualitative results for our generative model without candidate answers.
